# Supplementary material
Source: PubMed Central journal article supplement (PMC8100915)
Supplement: jamapsychiatry-e210707-s001.pdf [file jamapsychiatry-e210707-s001.pdf]

# Research Proposal

---

1 1. Title

2 Smoking Cessation After Psychiatric Hospitalization

3

4 2. Principal Investigator

5 Richard A. Brown, rab4339, School of Nursing

6 Kari Wolf, kw7773, Lead Seton Shoal Creek Site Co-Investigator

7

8 3. Purpose

9 Smoking rates among individuals with psychiatric disorders are disproportionately higher than the  
10 general population [1-4]. In fact, these individuals are estimated to consume *almost half* (44.3%) of all  
11 cigarettes smoked in the U.S. [5] and have lifespans 25 - 32 years shorter than the general population [6,  
12 7]. In 2011, 1.8 million U.S. adults, including 7.2% of adults with severe mental illness (SMI), received  
13 inpatient psychiatric treatment [8]. The majority of psychiatric hospitals ban smoking on hospital  
14 grounds, thus providing an opportunity for inpatients to experience abstinence. Yet these patients are  
15 infrequently provided with referrals for cessation treatment on discharge (< 1 %) and most resume  
16 smoking upon discharge [9]. Moreover, accumulating evidence [10, 11] indicates that smoking cessation  
17 may improve psychiatric symptoms in the long run [12-15]. Therefore, the integration of effective  
18 cessation interventions within the current mental health treatment system is a public health priority  
19 [16]. The overall objective of this project is to adapt a Sustained Care (SusC) model, shown to be  
20 effective for medically hospitalized smokers, to smokers with SMI engaged in a psychiatric  
21 hospitalization and to test the effects of SusC on smoking cessation and other outcomes relative to  
22 Usual Care (UC) for smoking cessation. All patients will receive a 5-10 minute, brief tobacco education  
23 session during their hospitalization, delivered by a hospital nurse. If effective, we expect that the  
24 adapted, Sustained Care model will be broadly disseminable, may be delivered at a low cost per quit and  
25 would have a significant impact in reducing morbidity and mortality due to smoking among individuals  
26 with SMI.

27 Primary Aims: a) In a randomized, pragmatic effectiveness trial [17] designed to assess benefit in real-  
28 world practice, we will test the hypothesis that, among smokers in inpatient psychiatric treatment (n =  
29 422), Sustained Care (SusC) will result in superior long- term smoking cessation outcomes compared to  
30 Usual Care (UC). We hypothesize that SusC compared to UC will result in significantly higher rates of  
31 cotinine-validated, 7-day point prevalence tobacco abstinence at 6- and 12-month follow-ups. b) We  
32 hypothesize that a higher proportion of SusC vs. UC patients will use evidence-based smoking cessation  
33 treatment (counseling and/or medication) in the month after discharge.

34 Secondary Aims: a) To quantify the total cost of SusC and UC and, if SusC is effective, assess the  
35 incremental cost per quit of SusC compared to UC, b) The SusC intervention will be a cost-effective  
36 alternative (incremental cost per quit at 12 months) to UC from health system and individual  
37 perspectives. Tertiary Aims: exploratory aims will examine a) the effect of the SusC on health and health  
38 care utilization in the 12 months post-discharge (psychiatric symptoms, psychiatric and medical hospital  
39 readmissions and emergency room visits), and b) the effectiveness of SusC on smoking abstinence in  
40 patient subgroups defined by diagnosis.

### 41 4. Procedures

42 In a randomized, pragmatic effectiveness trial [17] designed to assess benefit in real-world practice, we  
43 will test the hypothesis that, among smokers with SMI engaged in inpatient psychiatric treatment (n =  
44 422), Sustained Care (SusC) will result in superior short- and long- term smoking cessation outcomes  
45 compared to Usual Care (UC). SusC components include: a) one 40-minute session of in-hospital  
46 counseling, delivered by a hospital-employed Social Worker, b) up to 8 weeks of free transdermal  
47 nicotine patches, c) Interactive Voice Response (IVR) automated phone calls and text messages, and d)  
48 warm transfer to tobacco quitline. All hospital patients will receive a 5-10 minute, brief tobacco  
49 education session delivered by a hospital nurse during the course of their hospitalization. Smoking  
50 status will be assessed at 1, 3, 6, and 12 months post-discharge (See Figure 1 for study timeline).

51 The primary outcome is cotinine-validated, 7-day point-prevalence tobacco abstinence at 6- and 12-  
52 month follow-up. Additional outcome measures will include the proportion of participants who use  
53 smoking cessation medication or counseling after discharge, other tobacco abstinence measures (e.g.,  
54 sustained abstinence, time to first lapse), and outcomes stratified by patient diagnostic categories. A  
55 secondary analysis will examine the incremental cost-effectiveness of SusC relative to UC. Exploratory  
56 analyses will examine the effect of SusC on outcomes relative to UC on health and health care utilization  
57 including psychiatric symptoms and hospital readmissions and emergency room visits, both psychiatric  
58 and medical.

59 Assignment to Study Condition and Recruitment Feasibility. Once consent has been obtained,  
60 participants will complete a baseline assessment (see Measures, below). To preclude possible  
61 contamination that might occur if patients within the same psychiatric unit were engaged in both  
62 conditions (SusC and UC) concurrently and were to share information with each other, patients within  
63 each unit will be recruited and randomized in cohorts of 21, with cohorts being assigned at random to  
64 either SusC or UC. Between cohorts there will be a wash out period of no recruitment until all  
65 participants from the previous cohort have been discharged (about one week). In order to insure that an  
66 equal number of cohorts (and therefore, patients) are assigned to each of the two experimental  
67 conditions, this random assignment will be done by choosing from among a fixed pool of cohort entries  
68 (20 from each experimental condition). As detailed below, we anticipate recruiting between 10 and 11  
69 participants each month (2-3 per week) during the 40-month recruitment period. In the last two cohorts  
70 in each experimental condition, we will recruit one extra patient (22 in all) to achieve our total sample  
71 size of 422. Due to concerns about possible experimenter bias, one of our off-site collaborators, who will  
72 have no contact with participants, will conduct the random cohort assignment and the research  
73 coordinator will be blind to condition assignment.

### 74 **Intervention Conditions**

#### 75 **Sustained Care (SusC) Service Intervention**

76 Sustained Care includes an evidence-based, post-discharge program that is intended to encourage and  
77 facilitate smokers' use of continued tobacco treatment (counseling and medication). SusC components  
78 include:

## Research Proposal

---

79 In-Hospital Counseling Session. Patients in SusC will receive a 40-minute, in-hospital motivational  
80 counseling session about smoking cessation. Seton Shoal Creek social workers, who are otherwise  
81 working full-time in total, will provide the SusC in-hospital sessions. These individuals will receive  
82 training and ongoing supervision by PI Dr. Brown, who has been a therapist and tobacco cessation  
83 intervention researcher for over 25 years and Ms. Jacki Hecht, who is an experienced motivational  
84 interviewing (MI) trainer and a member of the Motivational Interviewing Network of Trainers. The social  
85 worker/smoking counselors will follow written manuals for SusC in-hospital sessions to ensure standard  
86 delivery. Sessions will be audio-recorded in order to insure standardized delivery and to provide ongoing  
87 training and supervision when needed. Every effort will be made to assure that the social worker who  
88 delivers the smoking intervention is a different individual than the social worker assigned to work with  
89 the patient and his/her family regarding their psychiatric issues during the hospitalization. This  
90 counseling session is not part of routine hospital care, but rather an intervention that is being developed  
91 specifically for this study. The social workers already have training in motivational counseling, which is  
92 within the scope of their practice. This counseling session will be based upon the standardized protocol  
93 that Dr. Rigotti has implemented for all medical inpatients at Massachusetts General Hospital (MGH),  
94 but with modifications for the inpatient psychiatric setting. This counseling session will aim to help  
95 patients manage nicotine withdrawal symptoms and provide encouragement and advice to remain quit  
96 upon discharge. To alleviate concerns specific to smokers with SMI about the effects of quitting smoking  
97 on their psychiatric symptoms, counseling will provide motivational messages and graphical  
98 presentation of empirical data indicating that quitting smoking is not likely to exacerbate psychiatric  
99 symptoms and in one study, smoking cessation treatment was associated with fewer psychiatric hospital  
100 readmissions [18]. We will also attempt to motivate the use of the nicotine patches provided to patients  
101 upon discharge (see below). We will use graphical presentation of empirical evidence to highlight the  
102 expected benefits of combining behavioral counseling with pharmacotherapy (including the nicotine  
103 patch) for smoking cessation, resulting in a 4X greater chance of successfully quitting smoking than  
104 quitting on one's own [19, 20]. At the end of this session, the social worker will describe the procedure  
105 by which patients will be provided with the nicotine patches upon discharge, IVR telephone or text  
106 message counseling, see below). Also, the social worker will obtain a signed release so that a letter can  
107 be sent to their outpatient psychiatrist and their primary care physician upon discharge, informing them  
108 that the patient is participating in a smoking cessation study and encouraging their support for quitting  
109 smoking.

110 8 Week Supply of Free Nicotine Patches. At time of hospital discharge, the smokers assigned to SusC will  
111 receive 4 weeks of transdermal nicotine patches. At the 3<sup>rd</sup> IVR call or text messaging session (at 2 weeks  
112 post-discharge), they will be asked if they are still interested in quitting smoking. If they respond "Yes",  
113 they will be asked if they would like to receive 4 more weeks of nicotine patches. If they respond "Yes",  
114 4 weeks of nicotine patches will be mailed to them after contacting them to determine their smoking  
115 rate, if smoking. In all cases, the appropriate patch dosage(s) will be provided to them, based upon their  
116 pre-hospitalization smoking rate or smoking rate when contacted after the 3<sup>rd</sup> IVR call or text messaging  
117 session. Nicotine patches are an over-the-counter item, have relatively few side effects, and are  
118 available locally at pharmacies and other stores. Although the majority of patients will have already  
119 been using the nicotine patch during their hospitalization, they will also receive written information on  
120 proper medication use and possible side effects. In case of problems in using nicotine patches after  
121 discharge, patients will be told to contact the study staff. Study staff will contact a Seton Shoal Creek  
122 Hospital psychiatrist, who will follow up with them to address any problems.

## Research Proposal

---

123 Sustained counseling support by telephone for 3 months after hospital discharge. Post-discharge  
124 counseling support that persists for at least 1 month was identified in a 2008 meta-analysis as necessary  
125 to achieve long-term tobacco abstinence [21]. Patients assigned to SusC will be contacted by telephone  
126 8 times in the 3 months after discharge to receive this level of care. Consistent with our SusC model,  
127 two innovations are proposed to improve the disseminability and cost-effectiveness of the intervention:

128 Interactive Voice Response (IVR), Text Messaging and Free Proactive Telephone Counseling. IVR is a  
129 telephone technology in which a computer detects voice and touch tones and responds to callers with  
130 prerecorded audio. IVR systems can improve response rates by making multiple calls and doing so  
131 outside normal business hours. Colleagues at the Ottawa Heart Institute have adapted IVR technology  
132 for providing telephone cessation counseling to smokers after hospital admission for coronary heart  
133 disease. We are working with TelASK, the IVR provider used in Dr. Rigotti's research at Massachusetts  
134 General Hospital (MGH) and will adapt the model for use in inpatient smokers with SMI. An important  
135 innovation here is the opportunity provided to patients for an immediate warm transfer to a registration  
136 agent who will offer to connect patients to telephone, web-based and/or text-based quit coaching  
137 services. To maximize patients' access to added support for quitting, we will offer to connect patients  
138 with quit coaching resources in two ways: 1. by offering to "web enroll" them into the Alere online  
139 system that will trigger a quit coach to begin calling them after hospital discharge, and 2. through the  
140 IVR system. At the end of the motivational in-patient session, the smoking counselor will ask participants  
141 if they are considering quitting smoking within the next 30 days. If the answer is yes, they will ask if the  
142 participant would like to gain access to quit coaching resources for additional support. If the participant  
143 answers yes to both questions, the counselor will inform the Seton Study Coordinator, who will enroll  
144 them into the quit coaching program via the Alere online system. This enrollment will trigger a proactive  
145 phone call from a quit coach after the patient is discharged. In addition, the IVR-facilitated system  
146 (TelASK Technologies, Ottawa, Canada) will make 8 automated outbound phone calls at fixed times after  
147 discharge (2 days, 1 week, 2 weeks, 3 weeks, 4 weeks, 6 weeks, 8 weeks, and 12 weeks). Each call will  
148 collect standard information and offer an immediate "warm transfer" to live telephone counseling  
149 services and/or web or text-based quit coaching resources provided by Alere Wellbeing, the quitline  
150 provider for 27 U.S. states and more than 650 employers and health insurance providers. If participants  
151 accept the warm transfer to the Alere Wellbeing quitline, they will first hear a recorded message letting  
152 them know that quitline calls "are routinely recorded for quality assurance purposes". All recorded calls  
153 are deleted from the Alere Wellbeing system after 6 months of their occurrence. We are adapting the  
154 IVR being evaluated in Dr. Rigotti's ongoing, multisite trial by adding 3 more calls for a total of 8 calls, as  
155 well as by adding specific content for smokers with SMI. This will include tailored messages about the  
156 effects of smoking on psychiatric symptoms, specifically that smoking cessation is not likely to worsen  
157 symptoms and may even result in improved symptoms in the long-term. In addition to being able to  
158 receive these messages through IVR, participants will be asked if they are able and willing to receive  
159 intervention text messages during the consent process, in the event they are randomized into the  
160 Sustained Care condition. For those who agree and are randomized to Sustained Care, TelAsk will send a  
161 combination of alternating IVR and text messages to maximize participation in this part of the  
162 intervention. This plan affords maximum flexibility, such that participants can engage with the IVR  
163 messages at one contact, and text messages at another, and will increase the likelihood that they will  
164 engage with this sustained care program.

165 As in Dr. Rigotti's ongoing study, each IVR call and text messaging session will also assess: (1) current  
166 smoking status and intention to quit, (2) current nicotine patch use, (3) nicotine patch side effects, and

## Research Proposal

---

167 (4) patient's desire for quit coaching support. If patients are not using the nicotine patch or other  
168 medication as part of their quit smoking attempt, the IVR and text messages will include motivational  
169 messages about the importance of using the nicotine patch to assist in quitting smoking.

170 Criteria to trigger an offer of a transfer to telephone counseling and other quit coaching resources will  
171 be: (1) patient's request of counseling; (2) patients who resumed smoking after discharge but still want  
172 to quit; (3) patients who never started or who stopped using nicotine patches; (4) patients reporting  
173 nicotine patch side effects. Patients transferred to the quitline will receive its standard telephone  
174 counseling package with up to 5 proactive calls over 3 months with unlimited inbound calls. The  
175 counseling protocol aims (1) to provide cognitive-behavioral smoking cessation and relapse prevention  
176 tools, tailored to the individual smoker's characteristics and (2) to provide medication management and  
177 adherence support, with the goal of completing a full course of medication. Alere Wellbeing, along with  
178 85% of U.S. quitlines, provides special training for counselors in how to address mental health issues  
179 [22] and has a protocol for addressing suicidal ideation reported by callers.

### 180 Usual Care (UC)

181 Patients assigned to the UC condition will receive no other tobacco intervention other than the brief 5-  
182 10 minute tobacco education session that all hospitalized smokers will receive, delivered by a Seton  
183 Shoal Creek nurse. During this session, they will be provided with written handouts describing the  
184 stages of readiness for change in quitting, self-monitoring of smoking, self-management of smoking  
185 situations, relapse prevention, managing stress, other quitting tips and use of nicotine replacement  
186 therapy.

#### 187 a. Location

188 Data collection will occur at Seton Shoal Creek Hospital. This study involves a collaboration between  
189 investigators at University of Texas at Austin, Seton Shoal Creek Hospital, Massachusetts General  
190 Hospital, Brown University and Butler Hospital in Providence, RI. Investigators at Massachusetts General  
191 Hospital, Brown University and Butler Hospital will have no access to participant PHI and will only have  
192 access to completely de-identified data. Massachusetts General Hospital, Brown University and Butler  
193 Hospital investigators are involved in study design and implementation issues, and in the final year of  
194 the study, will be involved in data analysis of study data . . . again, only having access to de-identified  
195 data. IVR and text messaging services will be provided by TelAsk, Inc. of Ottawa, Canada and tobacco  
196 telephone quitline counseling, web-based and text-based quit coaching resources will be provided by  
197 Alere Wellbeing of Seattle, Washington.

198

#### 199 b. Resources

200 This study is supported by a grant from NIMH, 1 R01 MH104562-01.

201

#### 202 c. Study Timeline

203 It is anticipated that participant recruitment and data collection will begin in April 2015. Participants will  
204 be recruited over the ensuing 40 months, with recruitment ending July 2018. The last 12 month follow-  
205 ups would be completed in July 2019. Six-month follow-up results could be disseminated in the Spring of  
206 2019, and 12 month follow-up results could be disseminated as early as the Fall of 2019.

207

### 208 5. Measures

## Research Proposal

---

209 Overview. All measures will be administered at all timepoints (baseline and follow-ups), with the  
210 following exceptions: 1) screening, demographics, smoking history, and nicotine dependence are only  
211 collected at baseline; 2) measures of post-hospital smoking cessation treatment use and adherence and  
212 the Treatment History Interview are only administered at follow-ups; 3) An In-Hospital Smoking  
213 Education and Intervention Questionnaire is only administered at 1-month follow-up. See Table 1 for  
214 measures and schedule of administration.

215 Baseline assessment procedure. All patients will be referred to the study by their attending psychiatrist  
216 at Seton Shoal Creek Hospital. Following receipt of a psychiatrist referral into the study, patients'  
217 medical records will be screened to collect data relevant to patient inclusion/exclusion criteria. If  
218 deemed eligible based upon medical record screen, patients will proceed to participate in the informed  
219 consent process (including receipt of the Mini Mental State Exam (MMSE, described below) to assure  
220 final eligibility, followed by a baseline assessment conducted by the Research Coordinator. The  
221 additional measures will include detailed contact information for the patient and up to 6 close contacts  
222 in order to minimize loss to follow-up.

223 Follow-Up assessment procedure. Outcomes will be assessed 1, 3 and 6 months after hospital discharge.  
224 We will also conduct a 12-month follow-up for those participants who report 7-day point prevalence  
225 abstinence, confirmed biochemically, at the 6-month follow-up. The 1-month follow-up assesses  
226 behavior in the high-risk initial post-discharge period, whereas the 3-month follow-up measures  
227 outcomes at the end of SusC counseling and medication treatment. Follow-up assessments include both  
228 self-report measures and interview questions. For those participants providing a personal email address,  
229 self-report measures will be emailed to them for completion via a weblink to REDCap (see Section 6.d.4.  
230 for a complete discussion of REDCap security features). For those participants not providing an email  
231 address, paper self-report questionnaires will be mailed to their home or self-report questions will be  
232 asked of them over the phone. The Research Coordinator, who is blinded to the participant's group  
233 assignment (SusC or UC), will ask the self-report questions over the phone (when necessary) and will  
234 conduct the interview portion of the follow-up assessment by telephone. The Research Coordinator will  
235 make up to 10 calls at different times of day and days of the week and will call participants alternate  
236 contacts when needed to locate them. Participants will be compensated for completing in-hospital and  
237 follow-up interviews using ClinCards, a MasterCard product that allows researchers to upload  
238 participant payments via a web portal. Participant payments will be in the following amounts: \$5 upon  
239 hospital discharge for completion of the baseline assessment, \$30 at the 1- and 3-month follow-ups and  
240 \$60 at the 6-month follow-up. We will also conduct a 12-month follow-up for those participants who  
241 report 7-day point prevalence abstinence, confirmed biochemically, at the 6-month follow-up.  
242 Participants for whom a 12-month follow-up is requested, will be compensated \$60 for completion of  
243 this follow-up. In addition, those participants who report 7-day point prevalence smoking abstinence at  
244 the 6-month follow-up (or 12-month follow-up, if applicable) will be asked to return to Seton Shoal  
245 Creek Hospital to provide carbon monoxide and saliva samples for biochemical verification of  
246 abstinence, and will be compensated \$40 (via ClinCards) for doing so. To maximize follow-up return  
247 rates, we will use multiple modalities to schedule phone appointments with participants. During the  
248 baseline assessment process, we will ask participants for their permission to send text messages and  
249 contact them via Facebook as a way to remind them of their follow-up assessment and to schedule a  
250 phone appointment to complete the assessment. A private Facebook Study page will be created that  
251 employs the strictest privacy settings. Study staff and participants will only be able to send individual  
252 private messages to one another; participants will not be able to post messages or upload information



## Research Proposal

253 to the study page profile. In addition, participants will be asked to provide the names, address and  
 254 phone numbers of up to 3 people whom we can contact to help us locate the participant, if we are  
 255 unable to reach the participant through the contact information they have provided. If we learn during  
 256 the follow-up phase of our study that a study participant is currently in jail, we will not continue to  
 257 contact them for the current follow-up assessment. However, we will continue to call them at future  
 258 follow-up time points, according to our protocol procedures, to see if the participant is released from  
 259 jail, able and willing to participate.

260

261

| <b>TABLE 1 - Measures</b>                       | Screen | BSL | 1MFU | 3MFU | 6MFU | 12MFU |
|-------------------------------------------------|--------|-----|------|------|------|-------|
| <b>Screening</b>                                |        |     |      |      |      |       |
| Medical Record Review for eligibility           | X      |     |      |      |      |       |
| In-Person Screening                             | X      |     |      |      |      |       |
| MMSE - to assess cognitive capacity for consent | X      |     |      |      |      |       |
| <b>Smoking History; FTND; Withdrawal</b>        |        |     |      |      |      |       |
| Smoking History                                 |        | X   |      |      |      |       |
| FTND - 6-item                                   |        | X   |      |      |      |       |
| Motivation to Quit Smoking                      |        | X   |      |      |      |       |
| Thoughts about Abstinence (TAA; 4-item)         |        | X   |      |      |      |       |
| <b>Primary Outcome - Smoking Behavior</b>       |        |     |      |      |      |       |
| Point Prevalence Abstinence (PPA)               |        | X   | X    | X    | X    | X     |
| Smoking Cessation Treatment Use and Adherence   |        |     | X    | X    | X    | X     |
| <b>Bio-Verification</b>                         |        |     |      |      |      |       |
| Carbon Monoxide (CO)                            |        |     |      |      | X    | X     |
| Saliva Cotinine                                 |        |     |      |      | X    | X     |
| <b>Psychiatric Symptoms</b>                     |        |     |      |      |      |       |
| PROMIS – Depression Short Form 8a               |        | X   | X    | X    | X    |       |
| PROMIS – Anxiety Short Form 8a                  |        | X   | X    | X    | X    |       |
| BASIS 24 – Psychosis Subscale                   |        | X   | X    | X    | X    |       |
| BASIS 24 – Emotional Lability Subscale          |        | X   | X    | X    | X    |       |
| <b>Psychiatric and Medical History/Hospital</b> |        |     |      |      |      |       |
| Treatment History Interview                     |        |     | X    | X    | X    |       |
| <b>Alcohol and Drug Involvement</b>             |        |     |      |      |      |       |
| Alcohol and Drug Use – Quantity and Frequency   |        | X   | X    | X    | X    |       |

262 Focus Group Follow-up Sub-study. We recognize that, depending on the results of this clinical trial, we  
 263 may want to contact participants after their last scheduled follow-up interview, to ask if they would be  
 264 interested in participating in a small, focus group study, so that the we might learn more about their  
 265 experiences with smoking and quitting following psychiatric discharge. If we go ahead with this study,  
 266 we would submit a detailed IRB addendum or a separate IRB protocol, if required. However, at this  
 267 point, we would add to the Consent for Participation in Research form, two checkboxes for participants  
 268 to indicate either that they agree to be recontacted by the researchers for participation in this small  
 269 focus group study or they do not agree to be recontacted for this purpose.

270

### 271 Patient Referral and Screening

272 All patients will be referred into the study by their attending psychiatrist at Seton Shoal Creek Hospital.  
273 Screening procedures will include a review of the medical record of all patients referred into the study,  
274 to determine if they meet eligibility criteria, including medical exclusions for the use of NRT, although  
275 most patients will already be receiving NRT during their hospital stay.

276 Having received the attending psychiatrist's referral and screened the medical record and determined  
277 preliminary eligibility, the study research assistant will administer the Mini Mental State Examination  
278 (MMSE; [23]) to the patient. The MMSE is a well validated and widely used screening exam for the  
279 detection of cognitive impairment ([23]). Any patient who scores less than 24 on the MMSE will be  
280 deemed ineligible to participate in the study. A score on the MMSE <24 is the generally accepted cutoff  
281 indicating the presence of cognitive impairment. A score of 24 or above is indicative of the absence  
282 cognitive impairment.

### 283 Smoking History/Motivation to Quit/Self-Efficacy, Nicotine Dependence, and Nicotine Withdrawal

284 Patients will provide a brief smoking history including years smoked, rate, nicotine dependence (6-item  
285 Fagerström Test for Nicotine Dependence, FTND [24]), quit attempts, and smoking cessation treatments  
286 used previously. They will also complete the 4-item Thoughts About Abstinence Scale [25], adapted from  
287 Marlatt [26], that assesses commitment, desire, and expected success/difficulty with abstinence.

### 288 Primary Outcome – Smoking Behavior

289 The primary measure of smoking behavior will be self-reported nonsmoking for the past 7 days (i.e., 7-  
290 day point prevalence abstinence, PPA) verified at 6- and 12-months by saliva cotinine analysis ( $\geq 15$   
291 ng/ml cutoff) [27]. We will also assess sustained tobacco abstinence and duration of continuous tobacco  
292 abstinence after hospital discharge (i.e., time to first lapse). Because NRT use produces a false positive  
293 cotinine, expired carbon monoxide (CO) ( $\geq 8$  ppm cutoff) will be substituted for cotinine in those  
294 reporting NRT use during the past 7 days. As stated earlier, at the 6- and 12-month follow-ups, we will  
295 offer participants a \$40 incentive for returning to Seton Shoal Creek Hospital to provide a saliva and/or  
296 breath sample. Participants who self-report smoking, do not provide a saliva or breath sample, whose  
297 cotinine or CO measures exceed the cut-offs, or who are lost to follow-up will be counted as smokers  
298 [27-29].

299 Because self-reported nonsmokers can fail to provide saliva or breath samples for reasons other than  
300 misrepresentation of smoking, validation of nonsmoking status by asking a significant other ("proxy  
301 validation") is an alternative validation strategy. Some trials in hospitalized smokers used it as a back-up  
302 strategy when a biochemical sample was not obtained [30-34]. As a secondary outcome measure, we  
303 will calculate self-reported point prevalence abstinence verified by either saliva cotinine or proxy  
304 validation.

305



## Research Proposal

---

### 306 Smoking Cessation Treatment Use and Adherence

307 At each follow-up, participants will report on their use of either counseling or pharmacotherapy or both  
308 modalities at each follow-up. Smoking cessation counseling is defined as telephone or in-person  
309 counseling from any source including a physician; pharmacotherapy includes use of NRT (nicotine patch,  
310 gum, lozenge, inhaler, or nasal spray), bupropion, or varenicline. Outcome measures include  
311 pharmacotherapy (any use, # weeks of use, use for  $\geq 1$  month) and counseling (any use, number of  
312 contacts, contact for  $>1$  month).

313

### 314 Health and Health Care Utilization Outcomes

315 Psychiatric Symptoms. Depressive symptoms will be assessed using the 8 items short form (Depression  
316 8a Participant Version) of the Patient Reported Outcomes Measurement Information System (PROMIS;  
317 [35, 36]). Anxiety symptoms will be assessed using the 8 item short form (Anxiety 8a Participant Version)  
318 of the PROMIS [35, 36]. PROMIS measures are the result of an NIH collaborative project and possess  
319 high reliability and validity [35, 36]. Psychotic symptoms will be assessed using the 4-item Psychotic  
320 subscale of the Behavior and Symptoms Identification Scale–24 (BASIS–24; [37]). Emotional lability will  
321 be assessed using the 3-item subscale of the BASIS-24 [37].

322 Psychiatric and Medical History / Hospital course. Primary and secondary discharge diagnoses, length of  
323 stay, type of insurance, discharge medications, and readmissions to Seton Shoal Creek Hospital will be  
324 abstracted from the patient's medical record. Participants will provide information about non-smoking  
325 related treatments e.g., medical and psychiatric inpatient hospitalizations and emergency room (ER)  
326 visits. Smoking cessation medication usage will be tracked at each follow-up interview in both study  
327 arms.

328 Healthcare Utilization. In order to examine potential differences in healthcare costs following  
329 intervention, we will collect data on psychiatric and medical hospital admissions and psychiatric and  
330 medical emergency room visits over the course of the 1-year following hospital discharge. We will do  
331 this by accessing available data within the Seton Healthcare Family and via self-report.

### 332 Alcohol and Drug Involvement

333 We will assess alcohol and drug use frequency and quantity using a series of questions that have been  
334 utilized in prior tobacco research [38].

### 335 Treatment Fidelity

336 The social workers/smoking counselors will follow written manuals for the SusC in-hospital sessions to  
337 ensure standard delivery of these sessions over the course of the study. All in-hospital sessions will be  
338 audiotaped and a random subset of 15% will be rated by independent raters to assess protocol  
339 adherence, with a checklist system used in prior trials [39].

340

## Research Proposal

---

341 Data Analysis Plan – From Grant Application - 1R01MH104562

342 Data Analysis Overview

343 As a first step, the equivalence of the random assignment of groups with regard to key baseline  
344 characteristics will be assessed. Other preliminary data analyses will include studies of patterns of  
345 missing data, research dropout rates, distributional properties of dependent and other measures, and  
346 correlations among outcome measures. Should groups differ on any characteristic, these variables will  
347 be used as covariates in the primary outcome analyses.

348 Primary Aims

349 Aim A.1.a. Tests of the effects of treatment on the primary outcome variable (7-day PPA at 6-, and 12-  
350 month post-quit) will be conducted using Generalized Estimating Equations (GEE) [40] [41]. As  
351 recommended by an SRNT working group [42], GEE is a method of repeated measures analyses for  
352 categorical outcomes that allows for inclusion of both categorical and continuous independent variables  
353 and for appropriate modeling of covariance structures when observations are correlated across time.  
354 The primary, between groups, independent variable in the GEE analysis is treatment group assignment,  
355 controlling for gender and nicotine dependence (FTND). The test of this effect is designed to answer the  
356 question, “When compared to BE, does ExC result in superior, long-term cessation outcomes in SMI  
357 smokers?”

358 Analyses will be conducted following the intention-to-treat principle. All subjects who have been  
359 randomized to treatment will be included in the analyses, with those lost to follow-up counted as  
360 smoking. This is the most conservative approach and represents our main outcome analysis.

361 Aim A.1.b. Multinomial logistic regression will be used to determine whether the proportion of patients  
362 that used evidence-based smoking cessation treatment (counseling and/or medication) in the month  
363 after discharge is higher in Extended Care vs. Brief Education (Aim A.1.b.). In a multinomial logistic  
364 regression model, the patients who did not use any treatment will be set as the reference group such  
365 that differences in the proportion of patients who used any treatment (counseling or medication vs. no  
366 treatment) and combined treatments (counseling and medication vs. no treatment) between  
367 interventions (ExC vs. BE) will be tested. Differences in participants’ self-reported frequency of  
368 treatment use will also be examined using separate linear regression models. We will report odds ratios  
369 and Cohen's d [144] as the effect sizes.

370

371 6. Participants

372 a. Target Population

373 Participants (n = 422) will be recruited from among adult psychiatric inpatients at Seton Shoal Creek  
374 Hospital in Austin, Texas. Individuals with psychiatric disorders have disproportionately high rates of  
375 cigarette smoking and society will benefit from the development of new interventions to assist these  
376 individuals to quit smoking.

377

## Research Proposal

---

378 b. Inclusion/Exclusion

379 Participants (n = 422) will be recruited from the adult psychiatric inpatient units at Seton Shoal Creek  
380 Hospital in Austin, Texas. Inclusion criteria: (a)  $\geq 18$  years of age, and (b) current smoker (i.e., at least 5  
381 cigarettes/day when not hospitalized). Exclusion criteria: (a) current diagnosis of dementia or other  
382 cognitive impairment that would limit study participation, (b) Mini-Mental State Examination (MMSE:  
383 [23]) score < 24, (c) patient's inability to provide consent for study participation due to his/her inability  
384 to demonstrate an understanding of study procedures as contained in the statement of informed  
385 consent, after no more than two explanations, (d) current diagnosis of mental retardation or autistic  
386 disorder, (e) current diagnosis of a (non-nicotine) substance use disorder requiring detoxification, (f) no  
387 access to a telephone or inability to communicate by telephone, (g) planned discharge to institutional  
388 care (e.g., nursing home, long-term rehab, jail, etc.), (h) no current or stable mailing address, (i) medical  
389 contraindication for the use of nicotine replacement therapy (NRT) and (j) pregnancy, breastfeeding, or  
390 plans to become pregnant within 6 months. All exclusions for psychiatric diagnosis above will be based  
391 upon the clinical diagnosis as recorded in the Seton Shoal Creek Hospital medical record.

392

393 c. Benefits

394 The anticipated benefits of the study are twofold: 1) There is the potential for participants to receive  
395 benefit from their study participation. All participants in both conditions (Sustained Care and Usual Care)  
396 will be assessed on various factors related to their cigarette smoking and will be followed over a 12  
397 month period to assess possible changes in their smoking status, thereby potentially increasing their  
398 knowledge of their cigarette smoking and related issues. Participants in both conditions will receive  
399 information about and be encouraged to use evidence-based smoking cessation treatment. Thus by  
400 participating in this project, there is the potential that participants may benefit in terms of increased  
401 knowledge about their smoking and/or in terms of helping them to quit smoking; 2) the results of the  
402 study will be used to advance understanding of factors related to smoking cessation among smokers in  
403 inpatient psychiatric treatment and will have considerable potential public health significance by  
404 determining whether the proposed Sustained Care intervention effectively motivates sustained  
405 abstinence after hospital discharge.

406 d. **Risks**

407 Potential risks include:

- 408 1. Risk of side effects from use of Nicotine Patch
- 409 2. Risk of Nicotine Withdrawal
- 410 3. Risk of suicidality/homicidality identified at follow-up time points
- 411 4. Risk of breach of confidentiality and loss of privacy
- 412 5. Risk that participants may feel coerced to participate in the study

413

## Research Proposal

---

### 414 Risk of Side Effects from use of Nicotine Patch

415 Risks. More common side effects of nicotine patch use include local skin irritation at the site of the  
416 patch, nausea, and disturbed and vivid dreams. Less common are allergic skin reactions.

417 Minimization. In order to protect against risk from pharmacotherapy usage, this study will only use  
418 nicotine patches, which are FDA-approved, and readily available as over-the-counter smoking cessation  
419 medications. Written and verbal instructions will be provided to patients given prescriptions for  
420 medication to contact the research study staff or their primary physician in case of adverse side effects  
421 from NRT use. Patients' outpatient psychiatrist and primary care physician will be sent a letter to inform  
422 them of patients' study participation and use of the nicotine patch. At the 1-month follow-up  
423 assessment call, the research assistant will screen for adverse events. Ultimately, the PIs will review any  
424 serious adverse events and report them appropriately to the University of Texas at Austin and Seton  
425 Healthcare Family IRBs and to NIMH.

426

### 427 Risk of Nicotine Withdrawal

428 Risks. For those participants attempting to quit smoking, there is a strong likelihood that they will  
429 experience some nicotine withdrawal symptoms, including anxiety, restlessness, anger, irritability,  
430 sadness, problems concentrating, appetite change and weight gain, insomnia, and decreased heart rate.

431 Minimization. If making a quit attempt, participants will be encouraged to also use nicotine replacement  
432 therapy which should diminish the overall severity of withdrawal discomfort, although not necessarily  
433 eliminate withdrawal discomfort entirely. Moreover, withdrawal symptoms are usually short-lived, with  
434 most symptoms abating within 1-2 weeks.

435

### 436 Risk of suicidality/homicidality identified at follow-up time points

437 Risks. Although unlikely to be caused by study participation, in this type of patient population, the risk of  
438 suicide or homicide is always present.

439 Minimization. Inpatient psychiatric units at Seton Shoal Creek Hospital are well equipped to manage  
440 patients at risk of suicide. All staff are fully trained to ascertain safety of patients and reduce their  
441 suicide risk. Moreover, all research staff that have direct involvement with patients will be fully trained  
442 by Seton Shoal Creek Hospital in procedures for assessment and intervention in cases where suicidal or  
443 homicidal ideation is expressed. If such cases occur during the course of the patient's hospitalization,  
444 research staff will immediately contact the clinical staff in the inpatient units. Appropriate clinical action  
445 will be taken in such circumstances, as determined by the patient's attending physician and the  
446 treatment team. If such cases occur during follow-up contacts (i.e., after inpatient hospitalization),  
447 research staff will immediately contact a Seton Shoal Creek psychiatrist, who will be on-call at all times,  
448 who will take appropriate clinical action.

## Research Proposal

---

449

450 Risk of breach of confidentiality and loss of privacy

451 Risks. The risk of loss of privacy is judged to be minimal.

452 Minimization. The informed consent document will state clearly to patients that the study is being done  
453 as a collaboration between the University of Texas at Austin and Seton Healthcare Family, TelASK, a  
454 company that makes automated phone calls; and Alere Wellbeing, a company that provides smoking  
455 cessation quitline counseling, along with web-based and text-based quit coaching resources.  
456 Participants will be informed that in order to make the phone calls, TelASK will be given their name,  
457 phone number, address, smoking status, and the date that they are discharged from the hospital but not  
458 any other protected information. Alere Wellbeing will be given their name, phone number, address,  
459 discharge date and information collected about their smoking behavior that has been collected as part  
460 of the research study. This is done to aid the Alere Wellbeing smoking counselors to provide counseling  
461 that is targeted to their smoking cessation needs.

462

463 Patients will be informed that information exchanged between the University of Texas at Austin, Seton  
464 Healthcare Family and the outside entities will be sent by way of a secure password-protected  
465 server. Data collected directly from participants and data abstracted from participants' medical  
466 records will be entered and tracked at Seton Shoal Creek Hospital using a University of Texas at  
467 Austin REDCap (Research Electronic Data Capture) account. REDCap is a secure, web application  
468 designed to support data capture securely for research studies, including Category I data (per the UT  
469 REDCap webpage), providing user-friendly web-based case report forms, real-time data entry  
470 validation (e.g. for data types and range checks), audit trails and a de-identified data export  
471 mechanism to common statistical packages (SPSS, SAS, Stata, R/S-Plus). REDCap also provides a  
472 powerful tool for building and managing online surveys. The research team can create and design  
473 surveys in a web browser and engage potential respondents using a variety of notification methods.  
474 The system was developed by a multi-institutional consortium that includes University of Texas at  
475 Austin and was initiated at Vanderbilt University. The database is hosted at the Population Research  
476 Center, which will be used as a central location for data processing and management. The PRC  
477 server has been cleared for Category-I data collection by UT's Information Security Office. Network  
478 transmissions (data entry, survey submission, web browsing, etc.) in REDCap are protected via  
479 Secure Sockets Layer (SSL) encryption. REDCap data collection projects rely on a thorough study-  
480 specific data dictionary defined in an iterative self-documenting process by all members of the  
481 research team with planning assistance from the PRC. The iterative development and testing  
482 process results in a well-planned data collection strategy for individual studies. REDCap provides a  
483 secure, web-based application that is flexible enough to be used for a variety of types of research,  
484 provide an intuitive interface for users to enter data and have real time validation rules at the time  
485 of entry.

486

## Research Proposal

---

487 Also, names will not be included on audio recordings or in any published reports. Electronic data,  
488 including audio files, will be stored on a secure, multi-layered password-protected server, UT Box,  
489 which is also authorized to safely store Category I data. Consent forms and any paper data will be  
490 stored in a locked file cabinet within a locked office. All staff are or will be fully trained by the  
491 Principal Investigator in relevant ethical principles and procedures, particularly around  
492 confidentiality. All audio recordings will be erased upon completion of data analysis.

493

494 We ensure local confidentiality by requiring rotating password access to client machines. Lastly, only the  
495 PI and the project director will have access privileges to export requested data. During the study,  
496 TelASK and Alere Wellbeing will establish a secure website to view call results in real time, quit  
497 statuses and counseling requests. Data will be transferred through a secure FTP (both to TelASK and  
498 Alere Wellbeing). Neither TelASK or Alere Wellbeing will share any patient information with any  
499 outside organizations or entities. Within one year of the completion of the study, all patient data will  
500 be purged from TelASK's data files. Alere Wellbeing will maintain any business records, per their  
501 standard procedures, that may include data provided by the investigators (for example, records of  
502 participants who receive clinical services from Alere Wellbeing). This will allow them to provide  
503 optimal service to these individuals, should they later call the State of Texas Tobacco Quitline,  
504 whose services are provided by Alere Wellbeing. Alere Wellbeing is a HIPAA-covered entity and has  
505 procedures in place to maintain the security of all study data, including PHI.

506

507 Risk that participants may feel coerced to participate in the study

508

509 Risks. Issues related to coercion are unlikely since any patient's decision not to participate in the study  
510 will not influence their current treatment in the Seton Shoal Creek Hospital inpatient psychiatric  
511 units nor will it influence their future treatment or standing with the Seton Healthcare Family.

512 Minimization. In order to minimize the risk of potential coercion, written informed consent must be  
513 obtained from each participant prior to entering the study. The informed consent document will  
514 explain, in simple terms, before the participant is entered into the study, the risks and benefits to  
515 the participant. The informed consent document will contain a statement that the consent is freely  
516 given, that the participant is aware of the risks and benefits of entering the study, and that the  
517 participant is free to withdraw from the study at any time. Patients will be told and it is stated in the  
518 consent form that patients may refuse to answer any survey or interview questions. All patients will  
519 be instructed that their decision as to whether to participate in the study will not influence their  
520 current or future standing with Seton Shoal Creek Hospital or their treatment in the psychiatric  
521 inpatient units. Consent will be obtained after a thorough explanation of the study by research staff  
522 and opportunity for the participant to ask questions about the study. The IRB-approved consent  
523 document will be signed and dated by the participant and research staff member. The signed  
524 informed consent document will be retained with study records. Each participant will be given a  
525 copy of his or her signed informed consent.



## Research Proposal

---

526

527 e. Recruitment

528 f. All patients will be referred into the study by their attending psychiatrist at Seton Shoal Creek  
529 Hospital. Screening procedures will include a review of the medical record of all patients referred  
530 into the study, to determine if they meet eligibility criteria. The research coordinator will then  
531 approach the patient to explain the study procedures and determine if they are interesting in  
532 participating in the study.

533 As “discussed by email” and confirmed in an email to me from Sandra Borucki on 4/23/15, the patient  
534 record review and recruitment process has been modified to describe the acceptable procedure  
535 (attending physician referral, medical record review, approach potential subject for recruitment  
536 purposes). Being able to review the patient medical records after the MD referral but prior to  
537 approaching them, will assure that we will be able to rule patients out for certain diagnoses, and  
538 thus not have to do so after they are already recruited into the study. All procedures in the IRB  
539 protocol have been modified accordingly.

540

541 g. Obtaining Informed Consent

542 a) IRB Authorized Waiver of HIPAA Authorization and consent for medical record review: the purpose is  
543 to determine eligibility status, especially with regard to the following:

544

545 (1) current diagnosis of mental retardation or autistic disorder, (2) current primary diagnosis of a (non-  
546 nicotine) substance use disorder, and (3) planned discharge to institutional care (e.g., nursing home,  
547 long-term rehab, etc.).

548 The justification is as follows:

549 · The first two are needed, as patients do not always know their diagnoses. The third is important, as  
550 patients may not always be fully aware of plans to discharge them to institutional care.

551 · Clearly, it would be a disservice to patients to consent them into the study, only to then review the  
552 medical record and find out that they need to be excluded.

553 b) HIPAA Authorization for Research: the document will be signed by the subject to grant access to  
554 the complete existing health record until 12 months after the completion of the study.

555 c) In a study such as this, it is critical to be certain that participants are cognitively able to consent to  
556 study participation during their acute psychiatric hospitalization. We will utilize a three-faceted  
557 approach to assure that patients are cognitively able to provide consent during their acute  
558 hospitalization:

559 1. Prior to approaching any patient about possible study participation, we will consult with nursing staff  
The University of Texas at Austin  
Institutional Review Board- Revised May 2013

## Research Proposal

---

560 on the inpatient unit to obtain their opinion of whether the patient is cognitively able to provide  
561 informed consent and participate in the study. We will also require approval by the attending  
562 psychiatrist prior to approaching a patient for possible study recruitment.

563 2. Having received the attending psychiatrist's permission to approach the patient, the study research  
564 coordinator will administer the Mini Mental State Examination (MMSE; [23]) to the patient. Any  
565 patient who scores less than 24 on the MMSE will be deemed ineligible to participate in the study. A  
566 score of 24 or above is indicative of the absence of cognitive impairment.

567 3. We will utilize a process called *iterative feedback* [43] in order to ensure that patients fully  
568 understand the various aspects of their involvement in the study. A research coordinator, trained by  
569 the Principal Investigator, will provide the patient with a copy of the consent form and will provide a  
570 careful explanation of all aspects and details covered in the written consent. The research  
571 coordinator will then assess whether or not the patient understands the consent form and study  
572 procedures by querying the patient via open-ended questions about important aspects of the study  
573 protocol to assess his/her understanding of the procedures. "Understanding the consent and study  
574 procedures" will be defined by the ability of the patient to accurately answer this series of questions  
575 about the study procedure, based upon what was explained to them.

576 If the patient answers any questions incorrectly, the interviewer will review the relevant section(s) of  
577 the consent form a second time and query the patient again to determine whether he/she can  
578 provide an accurate response reflecting an understanding of that aspect of the study. If the patient  
579 still cannot demonstrate an understanding of the study procedure upon which he/she is queried  
580 after a second explanation, the patient will be deemed ineligible to participate in the study.

581 4. Therefore, in order to be eligible for study participation, patients must: a) not have an MMSE score <  
582 24, and b) must be able to demonstrate an understanding of study procedures contained in the  
583 statement of informed consent after no more than two explanations.

### 584 7. Privacy and Confidentiality

585 As described above (in Risks "6.d.4." - Risk of breach of confidentiality and loss of privacy), data  
586 collected directly from participants and data abstracted from participants' medical records will be  
587 entered and tracked at Seton Shoal Creek Hospital using a University of Texas at Austin REDCap  
588 (Research Electronic Data Capture) account. REDCap is a secure, web application designed to  
589 support data capture securely for research studies, including Category I data (per the UT REDCap  
590 webpage), providing user-friendly web-based case report forms, real-time data entry validation (e.g.  
591 for data types and range checks), audit trails and a de-identified data export mechanism to common  
592 statistical packages (SPSS, SAS, Stata, R/S-Plus). Data collected from participants and exchanged  
593 between the University of Texas at Austin, Seton Healthcare Family and the outside entities will be  
594 sent by way of a secure password-protected server (UT Box). All participant identifiable information  
595 will be destroyed within 12 months from the completion of the study.

596 Also, names will not be included on audio recordings or in any published reports. Electronic data,  
597 including audio files, will be stored on a secure, multi-layered password-protected server, UT Box,  
598 which is also authorized to safely store Category I data. Consent forms and any paper data will be

## Research Proposal

---

599 stored in a locked file cabinet within a locked office. All staff are or will be fully trained by the  
600 Principal Investigator in relevant ethical principles and procedures, particularly around  
601 confidentiality. All audio recordings will be destroyed 6 months after the end of the study.

602

603 Neither TelASK nor Alere Wellbeing will share any patient information with any outside organizations or  
604 entities. Within one year of the completion of the study, all patient data will be purged from  
605 TelASK's data files. Alere Wellbeing will maintain any business records, per their standard  
606 procedures, that may include data provided by the investigators (for example, records of  
607 participants who receive clinical services from Alere Wellbeing). This will allow them to provide  
608 optimal service to these individuals, should they later call the State of Texas Tobacco Quitline,  
609 whose services are provided by Alere Wellbeing. Alere Wellbeing is a HIPAA-covered entity and has  
610 procedures in place to maintain the security of all study data, including PHI.

611 Saliva samples will be collected and frozen in a locked freezer at Seton Healthcare Family, in preparation  
612 for sending, in batches, to a laboratory (Salimetrics, State College, PA) for analysis of cotinine levels.  
613 The saliva samples will be identified to the laboratory by only a numerical identifier and the samples  
614 will be destroyed at the laboratory according to their standard laboratory protocol following sample  
615 analysis. No saliva samples will be maintained at Seton beyond 12 months after the completion of  
616 the last 12-month follow-up.

617

### 618 8. Compensation

619 Participants will be compensated for completing follow-up interviews using ClinCards, a MasterCard  
620 product that allows researchers to upload participant payments via a web portal. Participant  
621 payments will be in the following amounts: \$5 upon hospital discharge for completion of the  
622 baseline assessment, \$30 at the 1- and 3-month follow-ups and \$60 at the 6-month follow-up. We  
623 will also conduct a 12-month follow-up for those participants who report 7-day point prevalence  
624 abstinence, confirmed biochemically, at the 6-month follow-up. Participants for whom a 12-month  
625 follow-up is requested, will be compensated \$60 for completion of this follow-up. In addition, those  
626 participants who report 7-day point prevalence smoking abstinence at the 6-month follow-up (or  
627 12-month follow-up, if applicable) will be asked to return to Seton Shoal Creek Hospital to provide  
628 carbon monoxide and saliva samples for biochemical verification of abstinence, and will be  
629 compensated \$40 (via ClinCards) for doing so. We expect that on the order of 15% of participants or  
630 less will report smoking abstinence and the payment is intended to compensate them for their  
631 additional time, effort and expense of returning to the hospital.

632

633

### 634 References:

635 1. Hughes, J.R., *Possible effects of smoke-free inpatient units on psychiatric diagnosis and*  
636 *treatment*. Journal of Clinical Psychiatry, 1993. **54**(3): p. 109-14.

## Research Proposal

---

- 637 2. Lising-Enriquez, K. and T.P. George, *Treatment of comorbid tobacco use in people with serious*  
638 *mental illness*. Journal of Psychiatry and Neuroscience, 2009. **34**(3): p. E1-2.
- 639 3. Grant, B.F., et al., *Nicotine dependence and psychiatric disorders in the United States: results*  
640 *from the national epidemiologic survey on alcohol and related conditions*. Archives of General  
641 Psychiatry, 2004. **61**(11): p. 1107-15.
- 642 4. CDC, *Vital Signs: Current Cigarette Smoking Among Adults Aged ≥18 Years with Mental Illness —*  
643 *United States, 2009–2011* in MMWR. 2013. p. 81-87.
- 644 5. Lasser, K., et al., *Smoking and mental illness: A population-based prevalence study*. Journal of  
645 the American Medical Association, 2000. **284**(20): p. 2606-10.
- 646 6. Parks, J., et al., *Morbidity and mortality in people with serious mental illness. 13th Technical*  
647 *Report*. 2006, National Association of State Mental Health Program Directors (NASMHPD)  
648 Medical Directors Council: Alexandria, VA.
- 649 7. Goff, D.C., et al., *Medical morbidity and mortality in schizophrenia: guidelines for psychiatrists*.  
650 Journal of Clinical Psychiatry, 2005. **66**(2): p. 183-94; quiz 147, 273-4.
- 651 8. Substance Abuse and Mental Health Services Administration, *Results from the 2011 National*  
652 *Survey on Drug Use and Health: Mental Health Findings*. NSDUH Series H-45, HHS Publication No.  
653 (SMA) 12-4725. 2012, Rockville, MD: Substance Abuse and Mental Health Services  
654 Administration.
- 655 9. Prochaska, J.J., P. Gill, and S.M. Hall, *Treatment of tobacco use in an inpatient psychiatric setting*.  
656 Psychiatric Services, 2004. **55**(11): p. 1265-70.
- 657 10. Bolam, B., R. West, and D. Gunnell, *Does smoking cessation cause depression and anxiety?*  
658 *Findings from the ATTEMPT cohort*. Nicotine Tob Res, 2011. **13**(3): p. 209-14.
- 659 11. Pomerleau, C.S., R.J. Brouwer, and O.F. Pomerleau, *Emergence of depression during early*  
660 *abstinence in depressed and non-depressed women smokers*. Journal of Addictive Diseases,  
661 2001. **20**(1): p. 73-80.
- 662 12. Weinberger, A.H., et al., *A preliminary study of sustained-release bupropion for smoking*  
663 *cessation in bipolar disorder*. Journal of Clinical Psychopharmacology, 2008. **28**(5): p. 584-7.
- 664 13. Chengappa, K.N., et al., *Bupropion sustained release as a smoking cessation treatment in*  
665 *remitted depressed patients maintained on treatment with selective serotonin reuptake inhibitor*  
666 *antidepressants*. Journal of Clinical Psychiatry, 2001. **62**(7): p. 503-8.
- 667 14. McFall, M., et al., *Improving the rates of quitting smoking for veterans with posttraumatic stress*  
668 *disorder*. American Journal of Psychiatry, 2005. **162**(7): p. 1311-9.

## Research Proposal

---

- 669 15. Thorsteinsson, H.S., et al., *The effects of transdermal nicotine therapy for smoking cessation on*  
670 *depressive symptoms in patients with major depression*. *Neuropsychopharmacology*, 2001.  
671 **24**(4): p. 350-8.
- 672 16. Ziedonis, D., et al., *Tobacco use and cessation in psychiatric disorders: National Institute of*  
673 *Mental Health report*. *Nicotine Tob Res*, 2008. **10**(12): p. 1691-715.
- 674 17. Roland, M. and D.J. Torgerson, *What are pragmatic trials?* *BMJ*, 1998. **316**(7127): p. 285.
- 675 18. Prochaska, J.J., et al., *Efficacy of Initiating Tobacco Dependence Treatment in Inpatient*  
676 *Psychiatry: A Randomized Controlled Trial*. *American Journal of Public Health*, 2013.
- 677 19. Fiore, M.C., et al., *Treating Tobacco Use and Dependence: 2008 Update*. 2008, Clinical Practice  
678 Guideline. Rockville, MD: U.S. Department of Health and Human Services. Public Health Service.  
679 May 2008.
- 680 20. Hughes, J.R., J.P. Keely, and S. Naud, *Shape of the relapse curve and long-term abstinence*  
681 *among untreated smokers*. *Addiction*, 2004. **99**: p. 29-38.
- 682 21. Regan, S., et al., *Use of nicotine replacement therapy by hospitalized smokers: Is there a benefit*  
683 *beyond the hospitalization?* 2008: Presented at the Society for Research on Nicotine and  
684 Tobacco, Portland, OR.
- 685 22. North American Quitline Consortium. *Results from the 2012 NAQC Annual Survey of Quitlines*.  
686 2013; Available from:  
687 [http://c.ymcdn.com/sites/www.naquitline.org/resource/resmgr/2012\\_annual\\_survey/oct23nag](http://c.ymcdn.com/sites/www.naquitline.org/resource/resmgr/2012_annual_survey/oct23nagc_2012_final_report.pdf)  
688 [c\\_2012\\_final\\_report .pdf](http://c.ymcdn.com/sites/www.naquitline.org/resource/resmgr/2012_annual_survey/oct23nagc_2012_final_report.pdf).
- 689 23. Folstein, M.F., L.N. Robins, and J.E. Helzer, *The Mini-Mental State Examination*. *Archives of*  
690 *General Psychiatry*, 1983. **40**(7): p. 812.
- 691 24. Heatherton, T.F., et al., *The Fagerstrom test for nicotine dependence: A revision of the*  
692 *Fagerstrom Tolerance Questionnaire*. *British Journal of Addiction*, 1991. **86**: p. 1119-1127.
- 693 25. Hall, S.M., B.E. Havassy, and D.A. Wasserman, *Commitment to abstinence and acute stress in*  
694 *relapse to alcohol, opiates, and nicotine*. *Journal of Consulting and Clinical Psychology*, 1990.  
695 **58**(2): p. 175-81.
- 696 26. Marlatt, G.A., S. Curry, and J.R. Gordon, *A longitudinal analysis of unaided smoking cessation*.  
697 *Journal of Consulting and Clinical Psychology*, 1988. **56**(5): p. 715-20.
- 698 27. SRNT Subcommittee on Biochemical Verification, *Biochemical verification of tobacco use and*  
699 *cessation*. *Nicotine & Tobacco Research*, 2002. **4**(2): p. 149-159.

## Research Proposal

---

- 700 28. West, R., et al., *Outcome criteria in smoking cessation trials: proposal for a common standard*.  
701 *Addiction*, 2005. **100**(15733243): p. 299-303.
- 702 29. Hughes, J.R., et al., *Measures of abstinence in clinical trials: issues and recommendations*.  
703 *Nicotine Tob Res*, 2003. **5**(12745503): p. 13-25.
- 704 30. Simon, J.A., et al., *Intensive smoking cessation counseling versus minimal counseling among*  
705 *hospitalized smokers treated with transdermal nicotine replacement: a randomized trial*. *Am J*  
706 *Med*, 2003. **114**(12753879): p. 555-562.
- 707 31. Taylor, C.B., et al., *Smoking cessation after acute myocardial infarction: effects of a nurse-*  
708 *managed intervention*. *Ann Intern Med*, 1990. **113**(2360750): p. 118-123.
- 709 32. Miller, N.H., et al., *Smoking cessation in hospitalized patients. Results of a randomized trial*. *Arch*  
710 *Intern Med*, 1997. **157**(9046892): p. 409-415.
- 711 33. Sivarajan Froelicher, E.S., et al., *High rates of sustained smoking cessation in women hospitalized*  
712 *with cardiovascular disease: the Women's Initiative for Nonsmoking (WINS)*. *Circulation*, 2004.  
713 **109**(14769679): p. 587-593.
- 714 34. Dornelas, E.A., et al., *A randomized controlled trial of smoking cessation counseling after*  
715 *myocardial infarction*. *Prev Med*, 2000. **30**(10731452): p. 261-268.
- 716 35. Pilkonis, P.A., et al., *Assessment of self-reported negative affect in the NIH Toolbox*. *Psychiatry*  
717 *Res*, 2013. **206**(1): p. 88-97.
- 718 36. Pilkonis, P.A., et al., *Item banks for measuring emotional distress from the Patient-Reported*  
719 *Outcomes Measurement Information System (PROMIS(R)): depression, anxiety, and anger*.  
720 *Assessment*, 2011. **18**(3): p. 263-83.
- 721 37. Cameron, I.M., et al., *Psychometric properties of the BASIS-24(c) (Behaviour and Symptom*  
722 *Identification Scale-Revised) Mental Health Outcome Measure*. *Int J Psychiatry Clin Pract*, 2007.  
723 **11**(1): p. 36-43.
- 724 38. Clark, M.A., et al., *A transdisciplinary approach to protocol development for tobacco control*  
725 *research: a case study*. *Transl Behav Med*, 2012. **2**(4): p. 431-40.
- 726 39. Brown, R.A., et al., *Efficacy of Sequential Use of Fluoxetine for Smoking Cessation in Elevated*  
727 *Depressive Symptom Smokers*. *Nicotine & Tobacco Research*, 2013.
- 728 40. Zeger, S.L. and K.Y. Liang, *Longitudinal data analysis for discrete and continuous outcomes*.  
729 *Biometrics*, 1986. **42**(1): p. 121-30.
- 730 41. Ziegler, A., C. Kastner, and M. Blettner, *The generalized estimating equations: An annotated*  
731 *bibliography*. *Biometrical Journal*, 1998. **40**(2): p. 115-139.



## Research Proposal

---

- 732 42. Hall, S.M., et al., *Statistical analysis of randomized trials in tobacco treatment: Longitudinal*  
733 *designs with dichotomous outcomes*. *Nicotine and Tobacco Research*, 2001. **3**: p. 193-202.
- 734 43. Stiles, P.G., et al., *Improving understanding of research consent disclosures among persons with*  
735 *mental illness*. *Psychiatric Services*, 2001. **52**: p. 780-785.
- 736
