# Supplementary material
Source: PubMed Central journal article supplement (PMC8100915)
Supplement: jamapsychiatry-e210707-s002.pdf [file jamapsychiatry-e210707-s002.pdf]

Brown. Sustained care smoking cessation intervention for individuals hospitalized for psychiatric disorders: the Helping HAND 3 randomized clinical trial. *JAMA Psychiatry*. Published online May 5, 2021. doi:10.1001/jamapsychiatry.2021.0707

## Data Sharing Statement

### Data

**Data available:** Yes

**Data types:** Deidentified participant data, Data dictionary

**How to access data:** [brown2@utexas.edu](mailto:brown2@utexas.edu)

**When available:** With publication

### Supporting Documents

**Document types:** Statistical/analytic code, Informed consent form

**How to access documents:** [brown2@utexas.edu](mailto:brown2@utexas.edu)

**When available:** With publication

### Additional Information

**Who can access the data:** Researchers whose proposed use of the data has been approved.

**Types of analyses:** For any scientific purpose.

**Mechanisms of data availability:** After approval of a proposal.

**Any additional restrictions:** None
